# Supplementary material for: Stretchable Nanofiber-Based Felt as a String Electrode for Potential Use in Wearable Glucose Biosensors
Source: MDPI journal article supplement (doi:10.3390/s24041283), 2024-02-17
Supplement: s1 [file s1]

## **Supplementary Material**

# **Stretchable Nanofiber Based Felt as a String Electrode for Potential Use in Wearable Glucose Biosensors**

**Bianca Seufert, Sylvia Thomas and Arash Takshi \***

Department of Electrical Engineering, University of South Florida, 4202 E. Fowler Avenue,  
Tampa, FL 33620, USA; bseufert@usf.edu (B.S.); sylvia@usf.edu (S.T.)

\* Correspondence: atakshi@usf.edu; Tel.: +1-813-974-1121

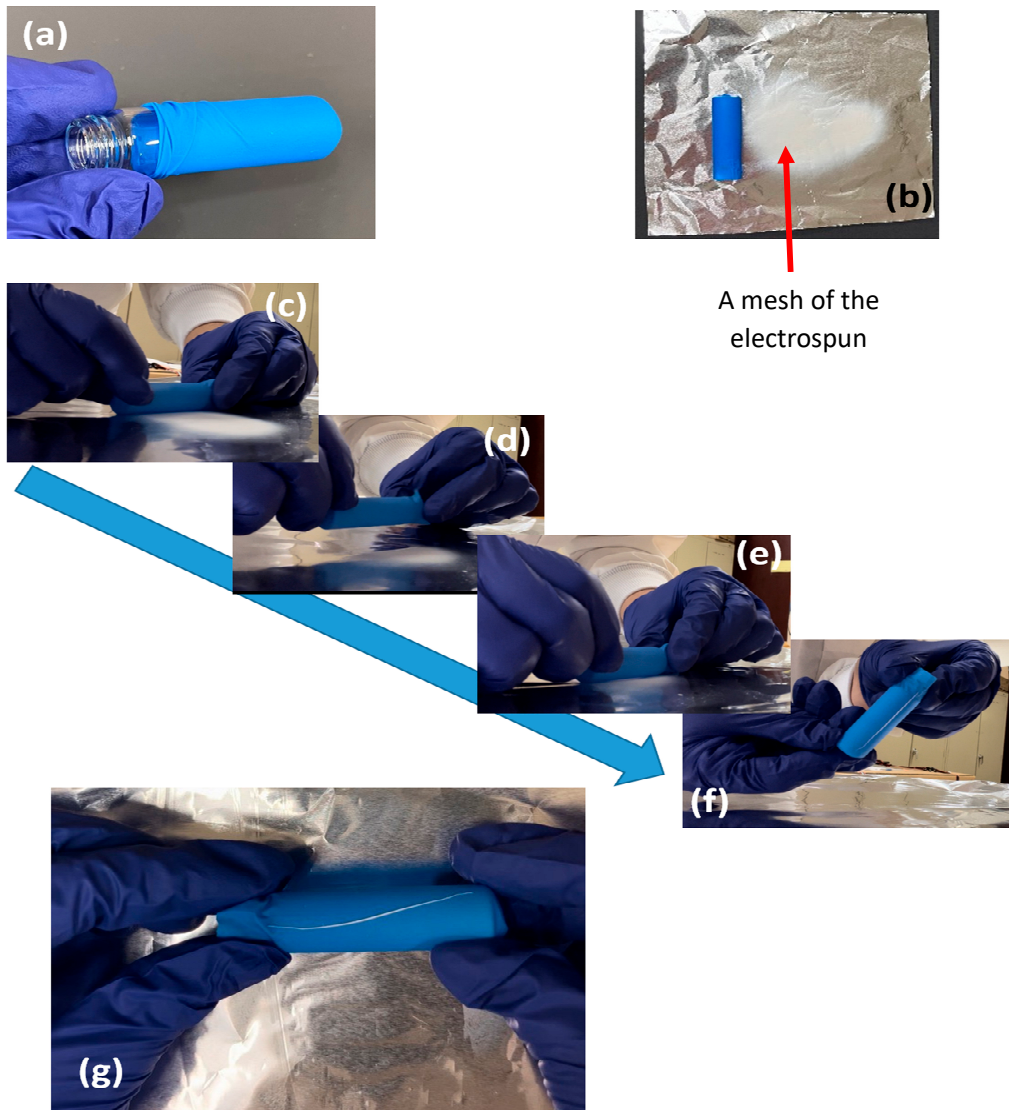

**Figure S1:** The fabrication process of making NF-Felt from the electrospun PVDF-HFP nanofibers. (a) The roller was made by using a piece of latex rubber on a glass vial. (b) shows a mesh of PVDF-HFP nanofibers on the aluminum collector. (c-f) The roller was manually pressed over the mat and as it was moved forward, it was rotated upward. (g) the NF-Felt string on the roller.

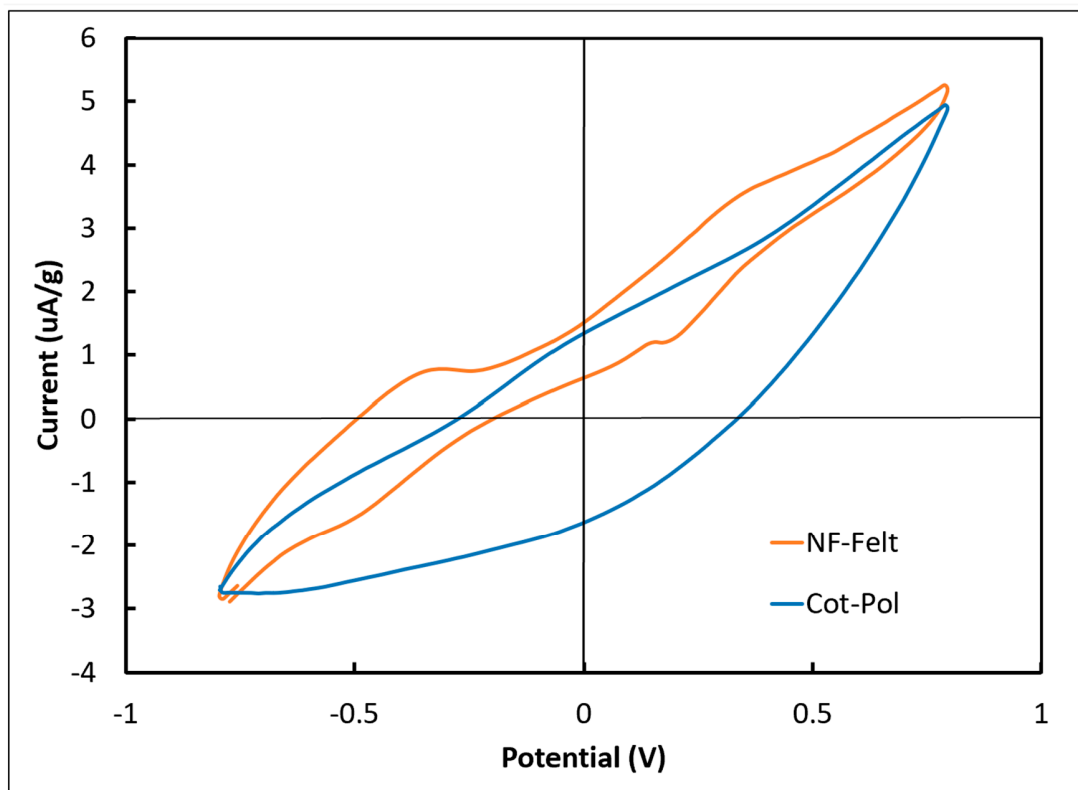

**Figure S2:** Cyclic voltammetry response comparison between Cot-Pol string electrode and NF-Felt string electrode.

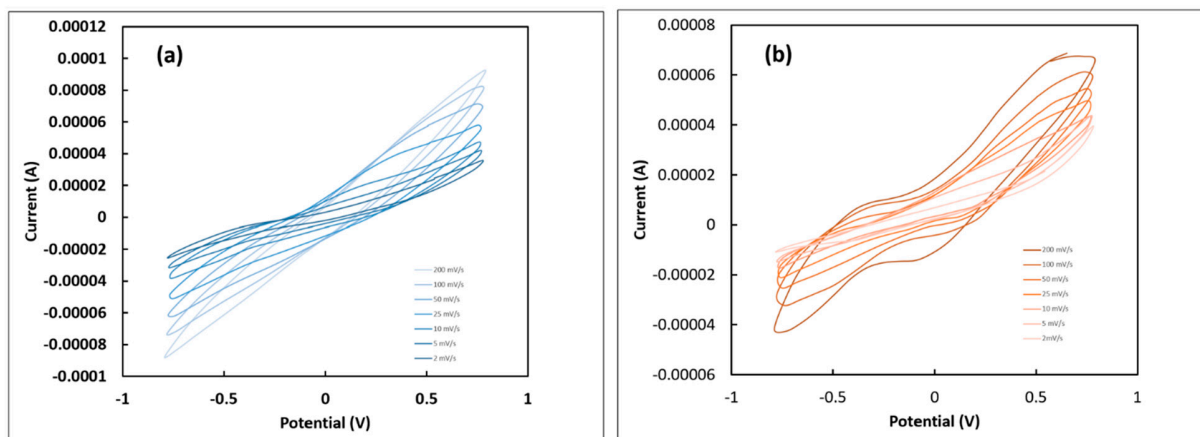

**Figure S3:** (a) Cyclic voltammetry response of Cot-Pol string electrode at varying scan rates (b) Cyclic voltammetry response of NF-Felt string electrode at varying scan rates.
